# Supplementary material for: Seasonal characteristics of organic aerosol chemical composition and volatility in Stuttgart, Germany
Source: Copernicus journal article supplement (doi:10.5194/acp-2019-364), 2019-04-30
Supplement: Supplementary file 1 [file acp-2019-364-supplement.pdf]

**Table S1.** Instruments installed in the measurement container.

| Measured parameter                                                     | Instrument                            | Data period      |                    |
|------------------------------------------------------------------------|---------------------------------------|------------------|--------------------|
|                                                                        |                                       | Summer 2017      | Winter 2018        |
| Ambient temperature                                                    | WS700 (Lufft GmbH)                    | July 7–August 17 | February 5–March 5 |
| Container temperature                                                  | WS700 (Lufft GmbH)                    | July 7–August 17 | February 5–March 5 |
| Dew point temperature                                                  | WS700 (Lufft GmbH)                    | July 7–August 17 | February 5–March 5 |
| RH                                                                     | WS700 (Lufft GmbH)                    | July 7–August 17 | February 5–March 5 |
| Pressure                                                               | WS700 (Lufft GmbH)                    | July 7–August 17 | February 5–March 5 |
| Wind speed                                                             | WS700 (Lufft GmbH)                    | July 7–August 17 | February 5–March 5 |
| Wind vertical                                                          | WS700 (Lufft GmbH)                    | July 7–August 17 | February 5–March 5 |
| Wind direction                                                         | WS700 (Lufft GmbH)                    | July 7–August 17 | February 5–March 5 |
| Rain                                                                   | WS700 (Lufft GmbH)                    | July 7–August 17 | February 5–March 5 |
| Rain type                                                              | WS700 (Lufft GmbH)                    | July 7–August 17 | February 5–March 5 |
| Rain rate                                                              | WS700 (Lufft GmbH)                    | July 7–August 17 | February 5–March 5 |
| Radiation                                                              | WS700 (Lufft GmbH)                    | July 7–August 17 | February 5–March 5 |
| Particle number concentration<br>(>7 nm)                               | CPC3022 (TSI Inc.)                    | July 5–August 17 | February 5–March 5 |
| Particle number concentration<br>(>2.5 nm)                             | CPC3776 (TSI Inc.)                    | July 5–August 17 | February 5–March 5 |
| O <sub>3</sub>                                                         | O341M (Environment SA)                | July 5–August 17 | February 5–March 5 |
| CO <sub>2</sub>                                                        | NGA2000 (Rosemount Inc.)              | July 5–August 17 | February 5–March 5 |
| SO <sub>2</sub>                                                        | AF22M (Environment SA)                | July 5–August 17 | February 5–March 5 |
| NO <sub>2</sub>                                                        | AS32M (Environment SA)                | July 5–August 17 | February 5–March 5 |
| Particle optical diameter<br>(0.18–18 µm)                              | OPC FIDAS200 (Palas GmbH)             | July 5–August 17 | February 5–March 5 |
| Particle size<br>(10–410 nm, d <sub>m</sub> )                          | NanoScan-SMPS (TSI Inc.)              | July 5–July 26   | /                  |
| Black carbon (BC)                                                      | AE51 Aethalometer (Aethlabs Inc.)     | July 5–August 17 | February 5–March 5 |
| Single particle composition and size<br>(0.2–2.5 µm, d <sub>va</sub> ) | LAAPTOF (AeroMegt GmbH)               | July 5–August 17 | February 5–March 5 |
| Particle mass and size<br>(0.07–2.5 µm, d <sub>va</sub> )              | AMS (Aerodyne Research Inc.)          | July 5–August 17 | February 5–March 5 |
| Particle-phase oxygenated organic molecules (offline filters)          | FIGAERO-CIMS (Aerodyne Research Inc.) | July 5–August 14 | February 8–March 5 |

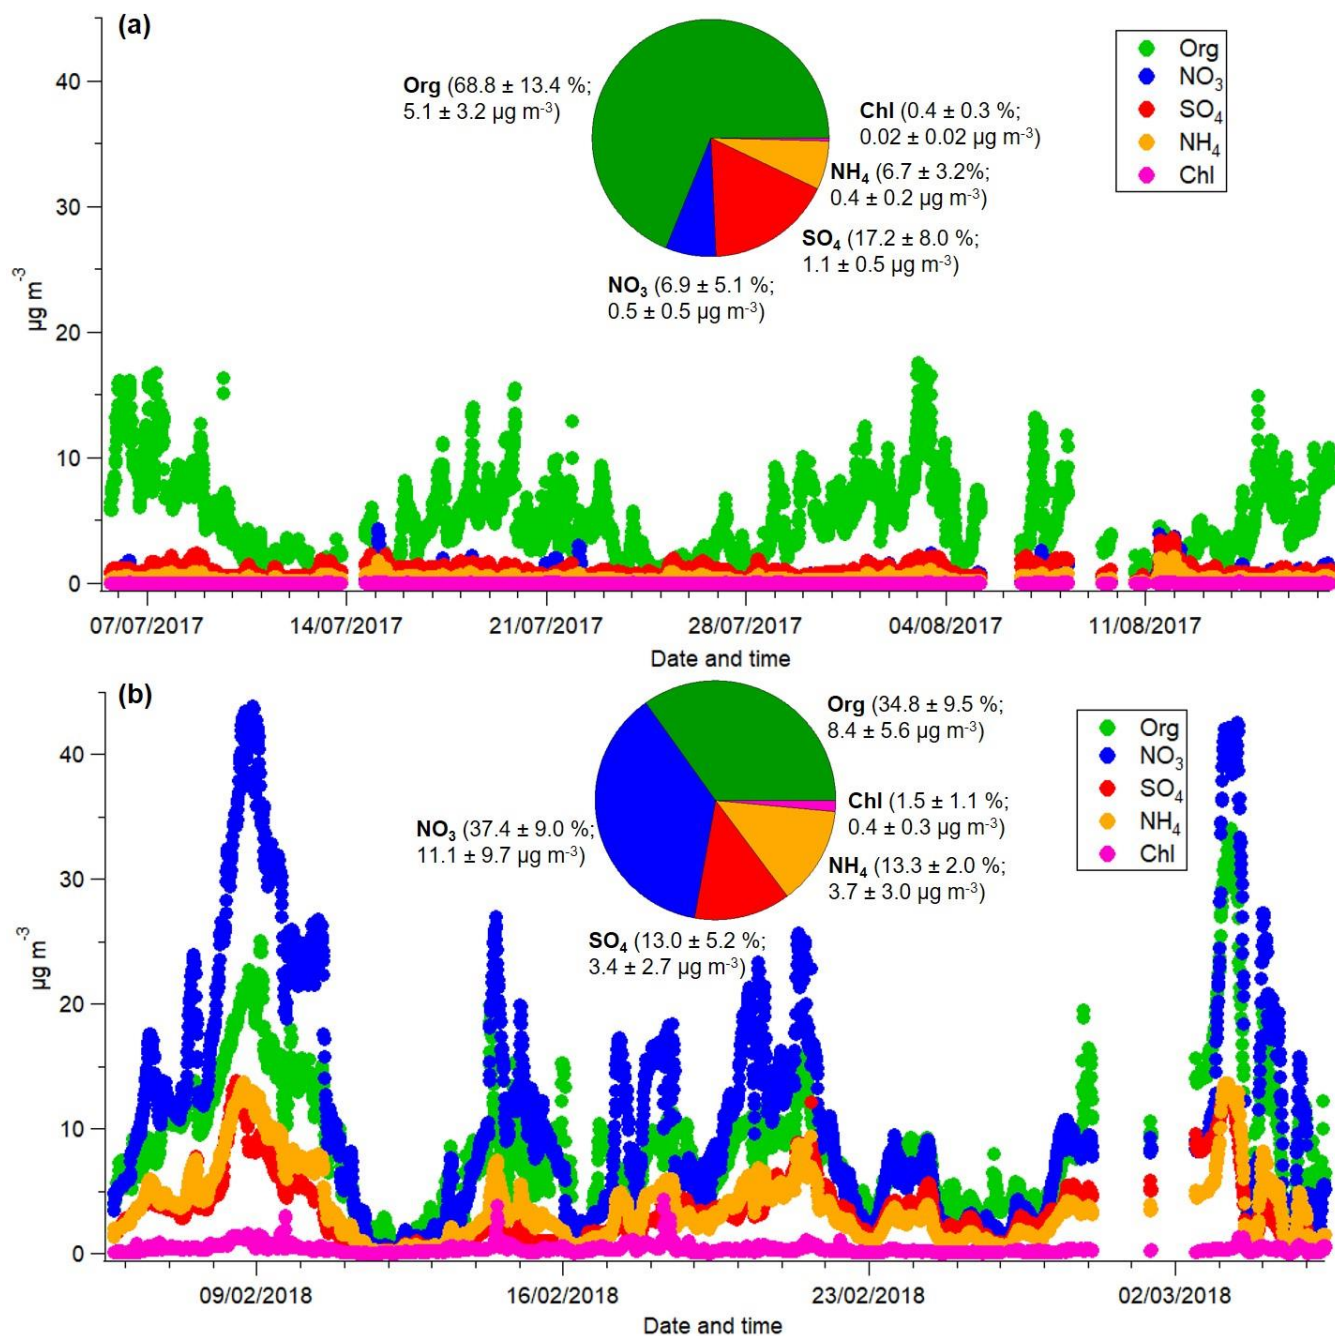

**Figure S1.** Time series of aerosol composition measured by AMS (Organics (Org), Nitrate (NO<sub>3</sub>), Sulfate (SO<sub>4</sub>), Ammonium (NH<sub>4</sub>), and Chloride (Chl)) in the summer (a) and winter (b) periods.

5

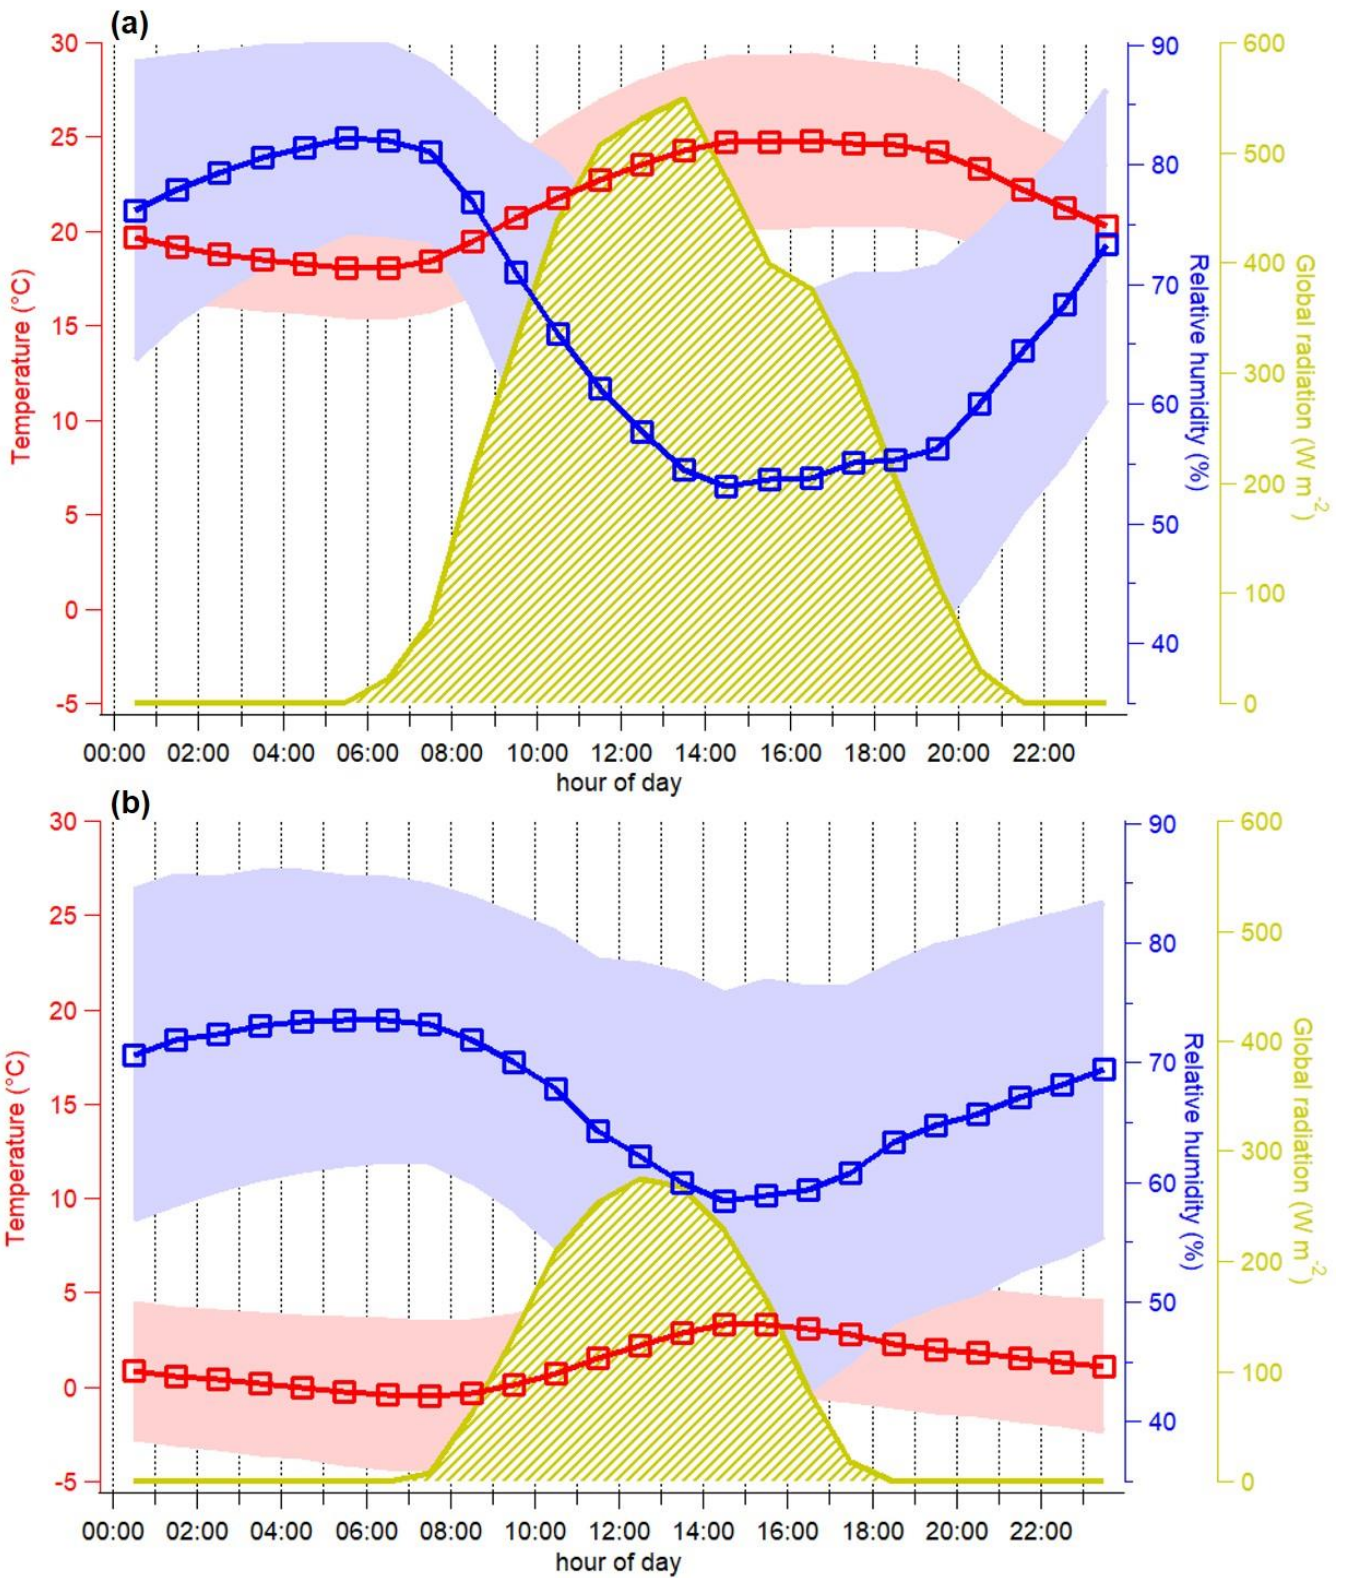

**Figure S2.** Mean diel patterns of ambient temperature, relative humidity, and global radiation in the summer (a) and winter (b) periods. The shaded areas represent  $\pm 1$  standard deviation.

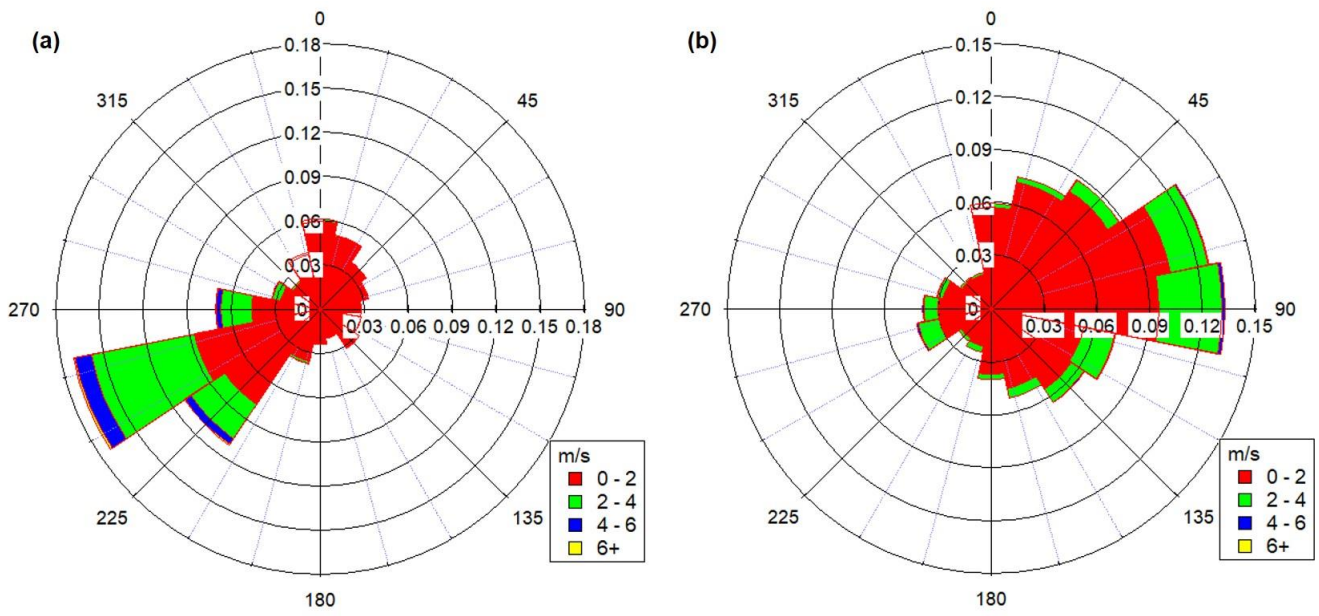

10 **Figure S3.** Wind speeds and directions for the summer (a) and winter (b) periods.



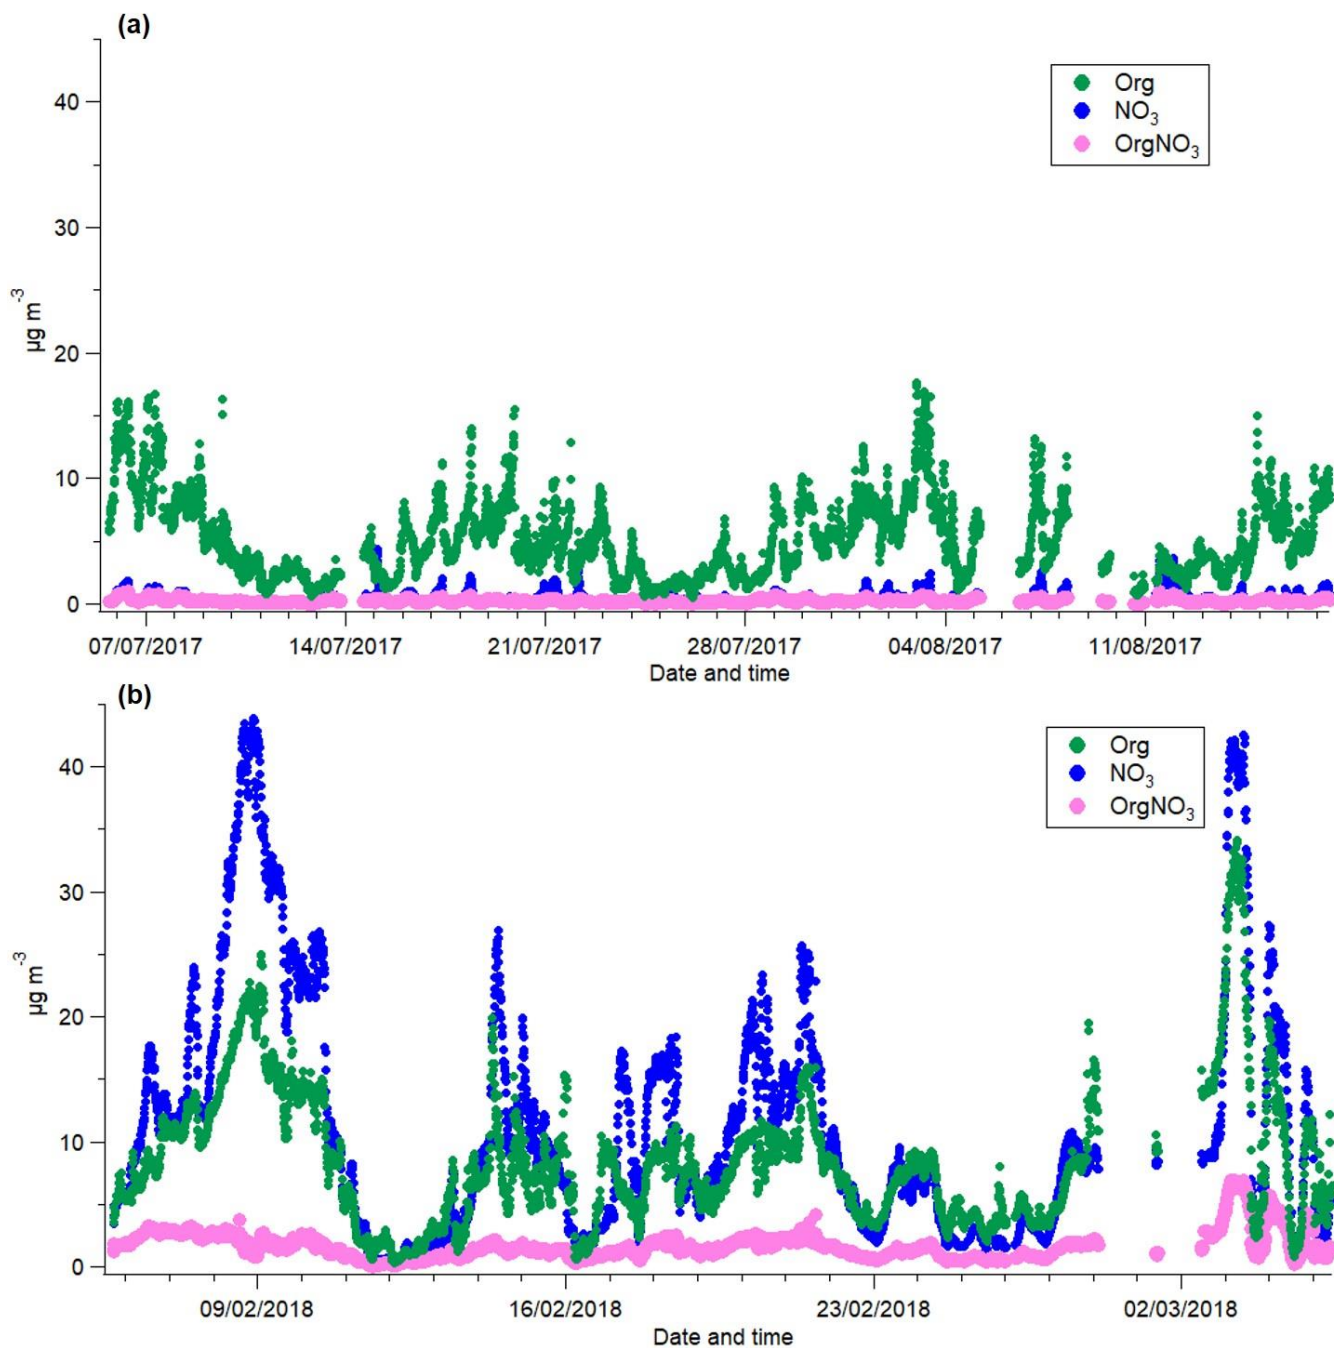

**Figure S4.** Comparison of time series of Organonitrates (OrgNO<sub>3</sub>) with Organics (Org) and Nitrate (NO<sub>3</sub>) by AMS for the summer (a) and winter (b) periods. OrgNO<sub>3</sub> concentrations were estimated based on the NO<sub>2</sub><sup>+</sup>/NO<sup>+</sup> ion ratio measured by AMS and assuming a ratio of 0.1 for OrgNO<sub>3</sub> (Farmer et al., 2010; Kiendler-Scharr et al., 2016).

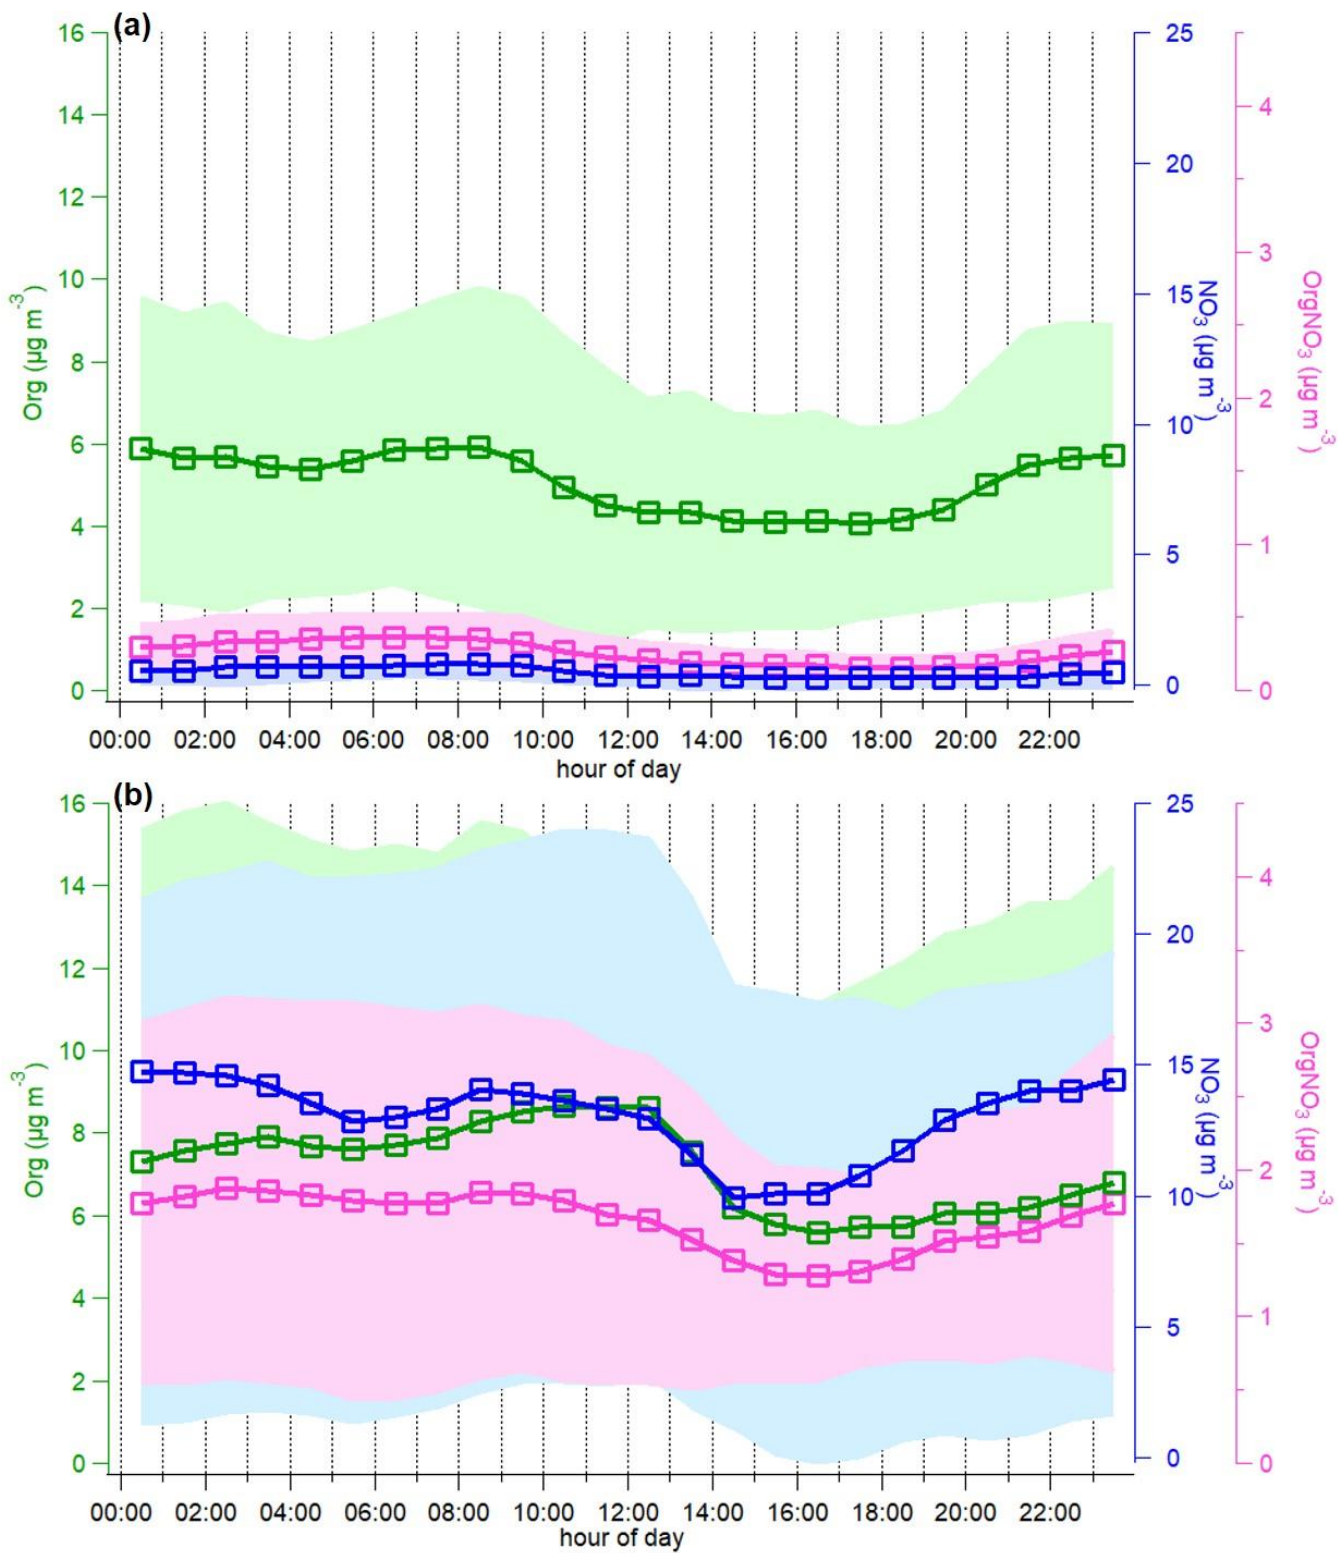

**Figure S5.** Mean diel patterns of Organics (Org), Nitrate ( $\text{NO}_3$ ), and Organonitrates ( $\text{OrgNO}_3$ ) by AMS for the summer (a) and winter (b) periods. The shaded areas represent  $\pm 1$  standard deviation.

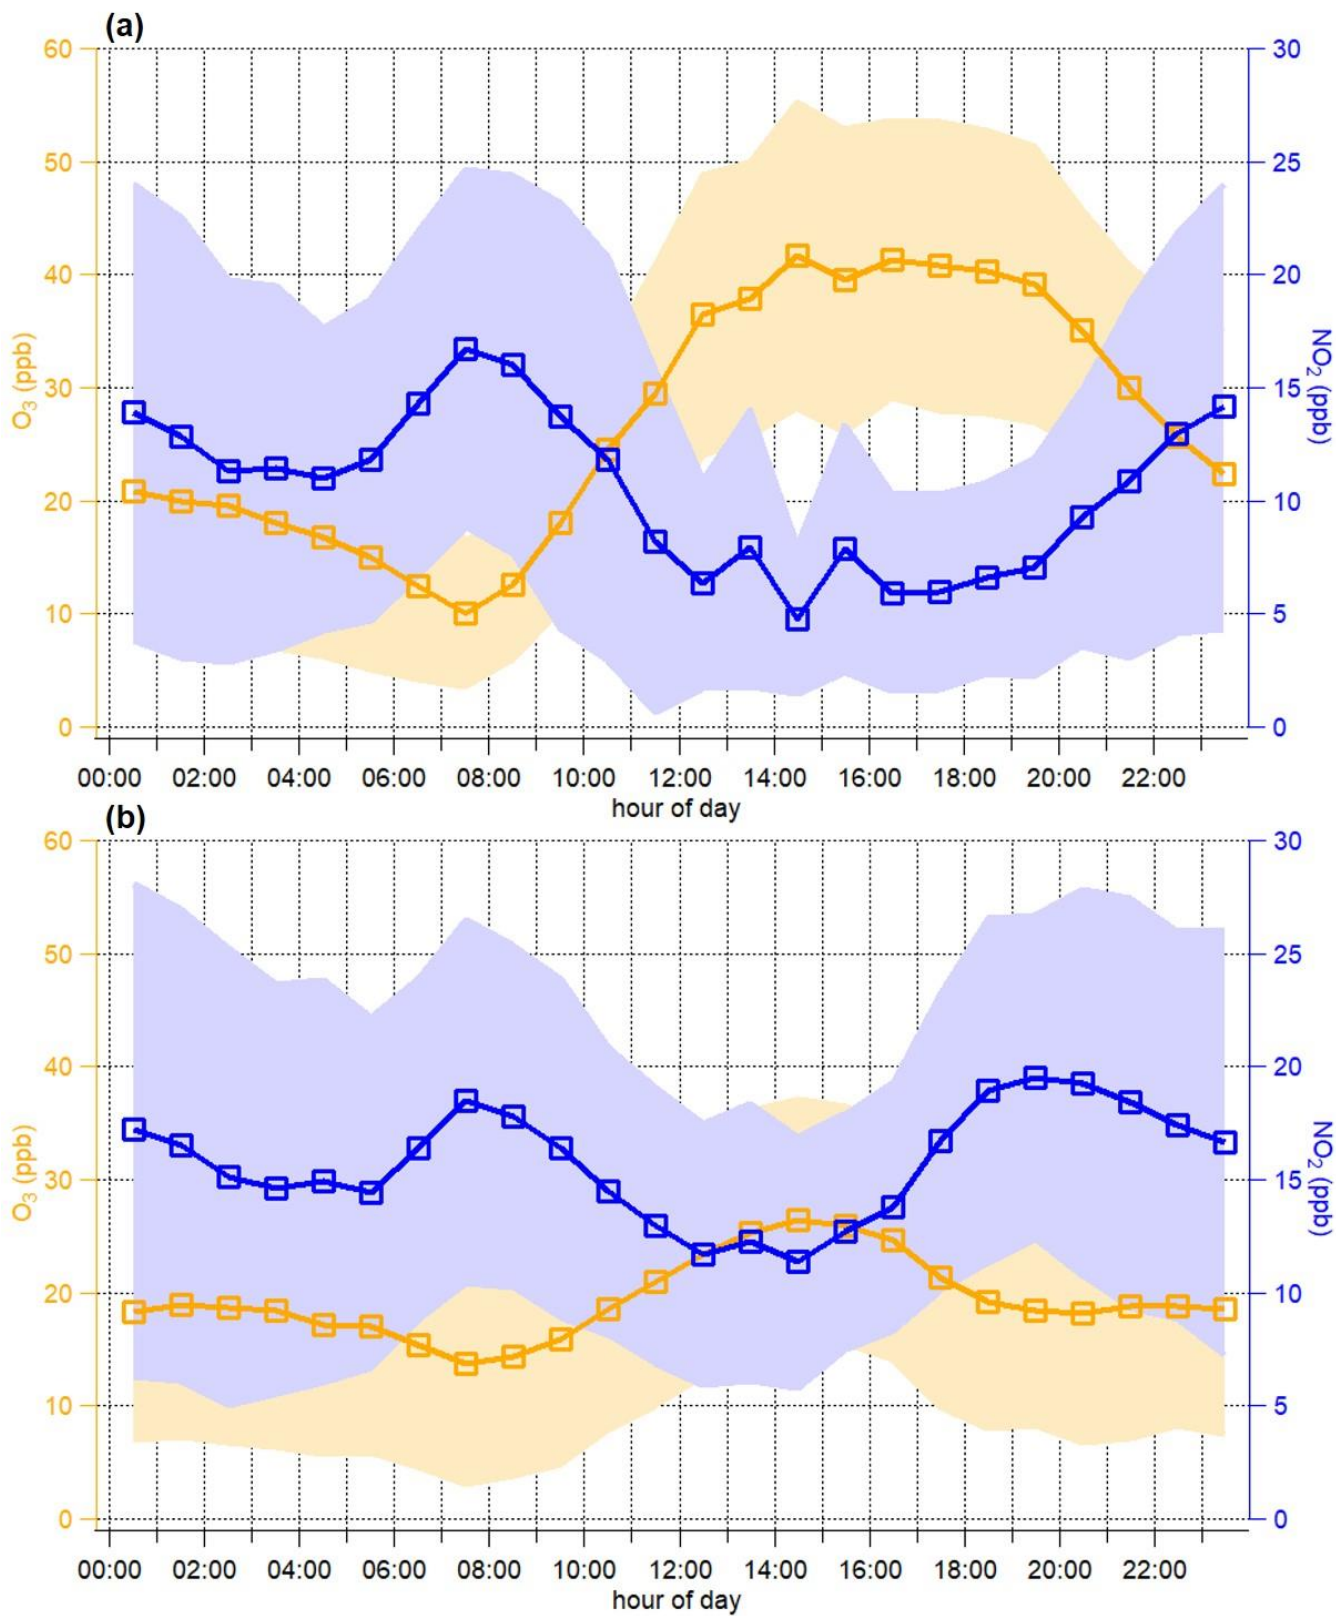

20 **Figure S6.** Mean diel patterns of O<sub>3</sub> and NO<sub>2</sub> mixing ratios for the summer (a) and winter (b) periods. The shaded areas represent ±1 standard deviation.

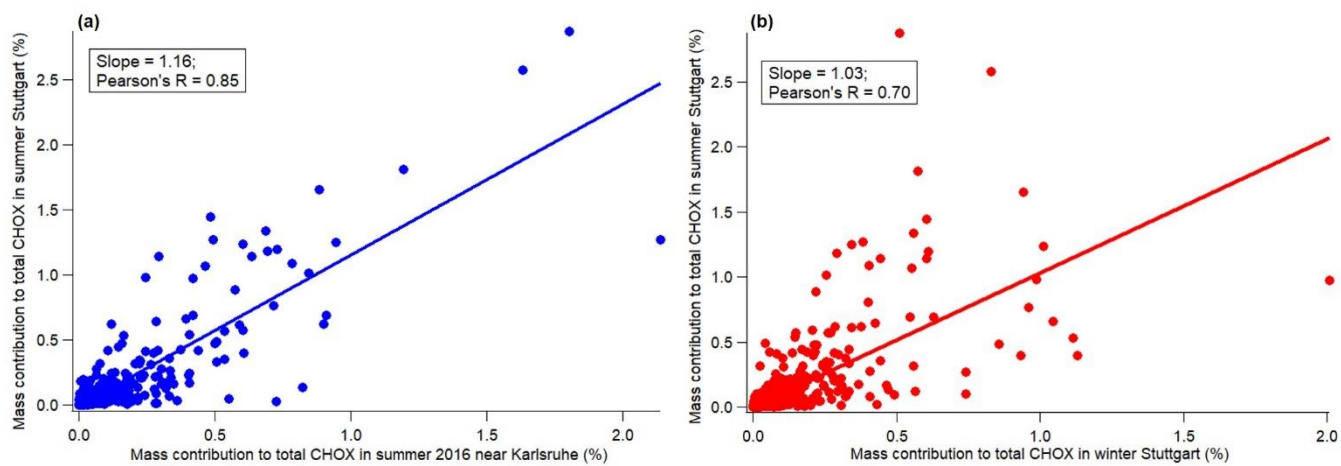

**Figure S7.** Correlations of CHOX compounds in summer 2017 in Stuttgart (a) with CHOX compounds in summer 2016 near Karlsruhe (Huang et al., 2019) and (b) with CHOX compounds in winter 2018 in Stuttgart after removing five prominent biomass burning tracer compounds ( $C_6H_{10}O_5$ ,  $C_6H_5O_3N$ ,  $C_7H_7O_3N$ ,  $C_6H_5O_4N$ , and  $C_7H_7O_4N$ ).

25



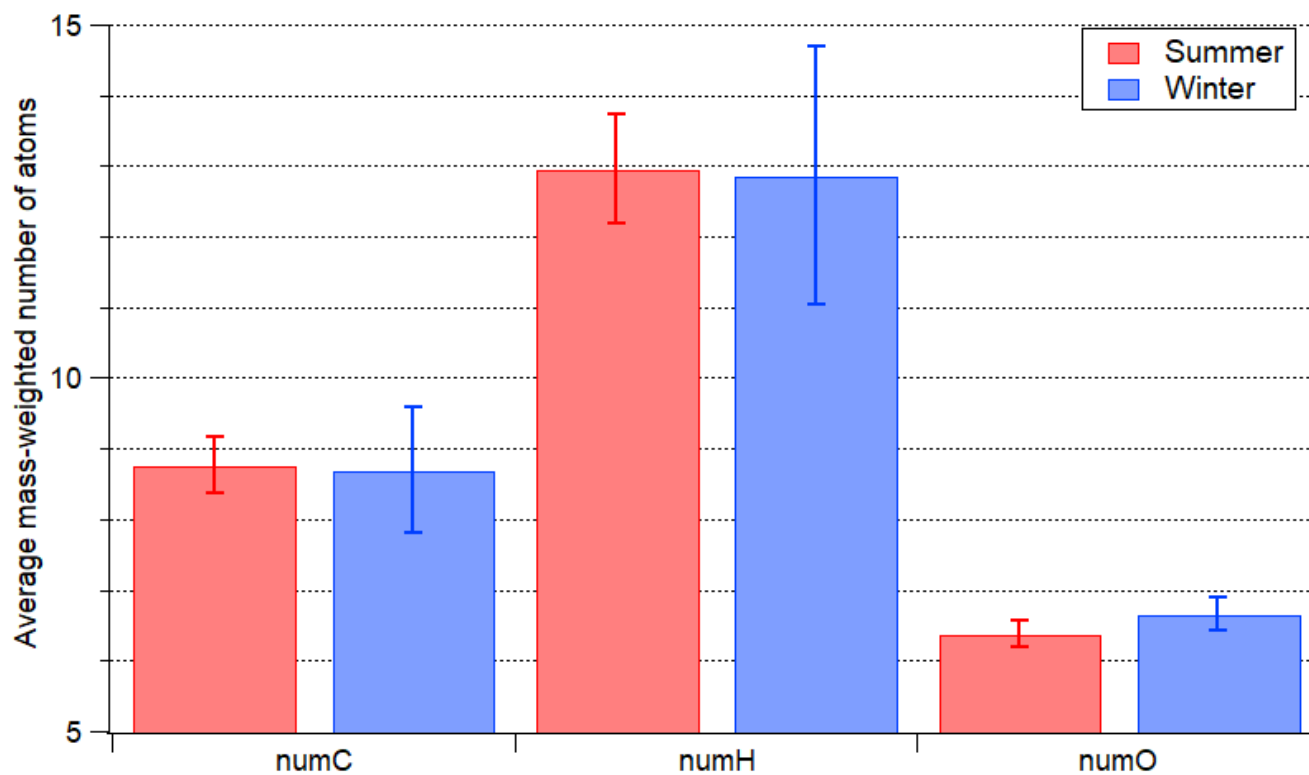

**Figure S8.** Average mass-weighted number of carbon atoms (numC), hydrogen atoms (numH), and oxygen atoms (numO) of the CHOX compounds for the summer and winter periods.

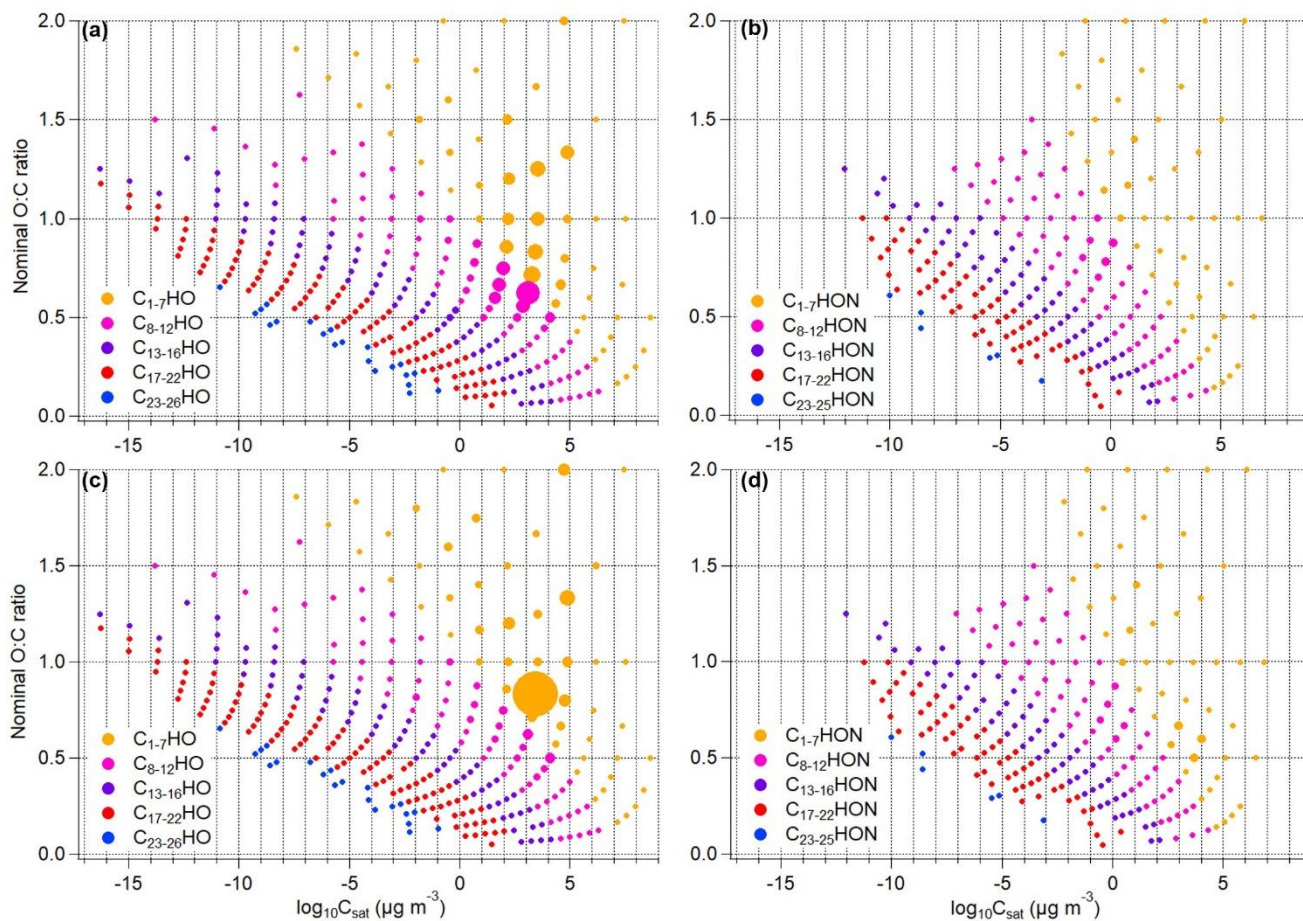

30 **Figure S9.** Volatility distribution of CHO compounds (a) and CHON compounds (b) in the summer period, CHO compounds (a) and CHON compounds (b) in the winter period vs their corresponding nominal O:C ratio. Markers were colored by different number of carbon atoms and sized by their corresponding mass contributions to total CHOX compounds.

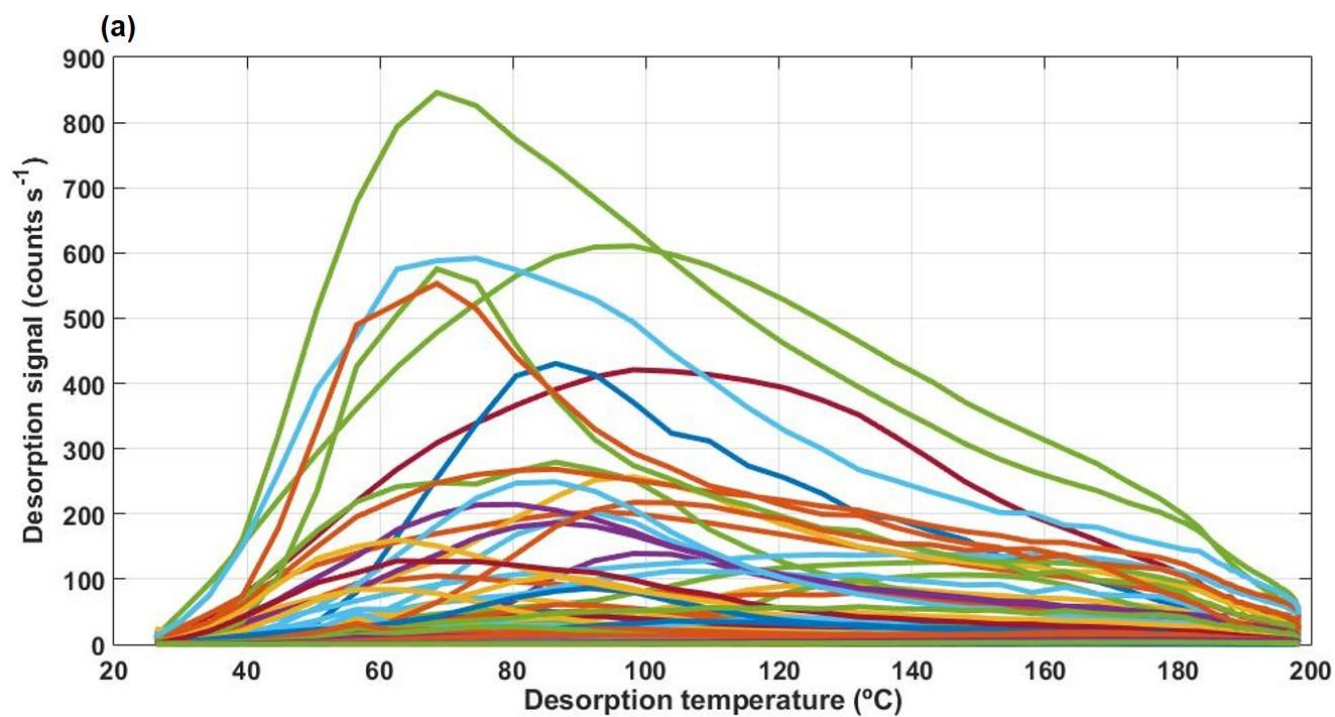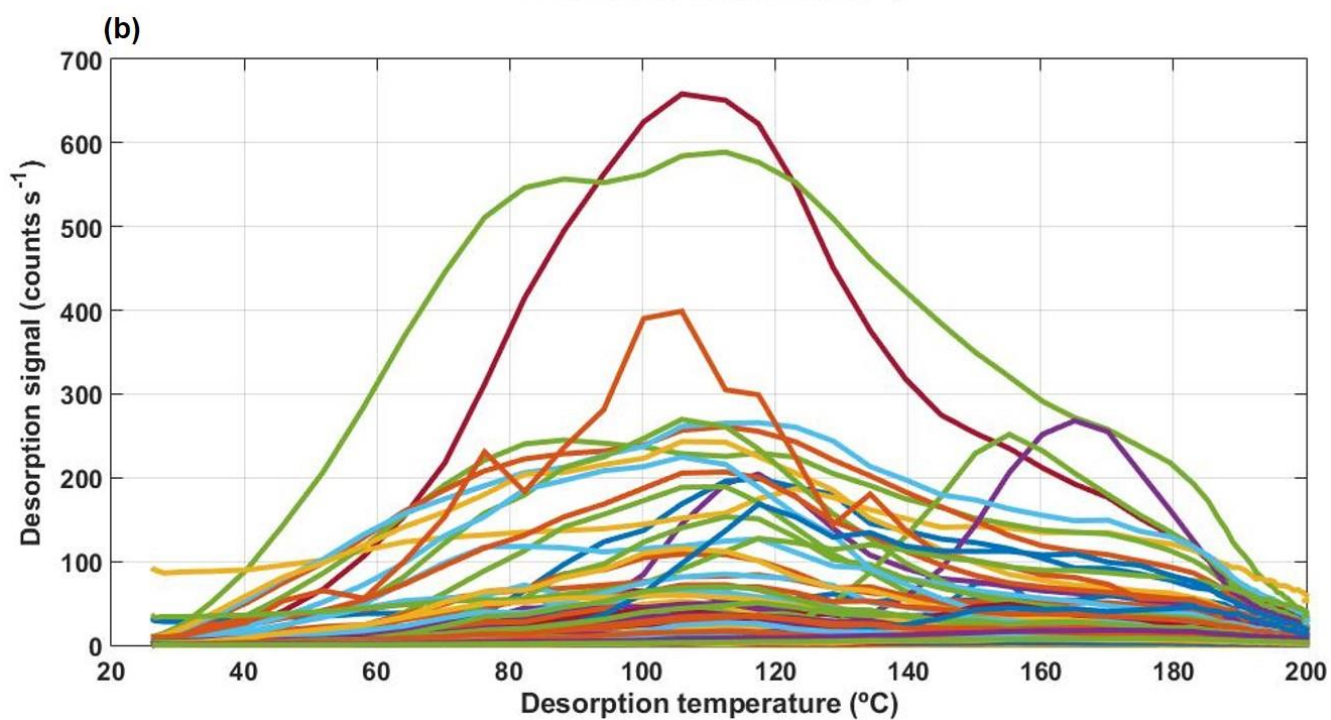

Figure S10. Thermograms of CHOX compounds with 1–5 carbon atoms for the summer (a) and winter (b) periods.



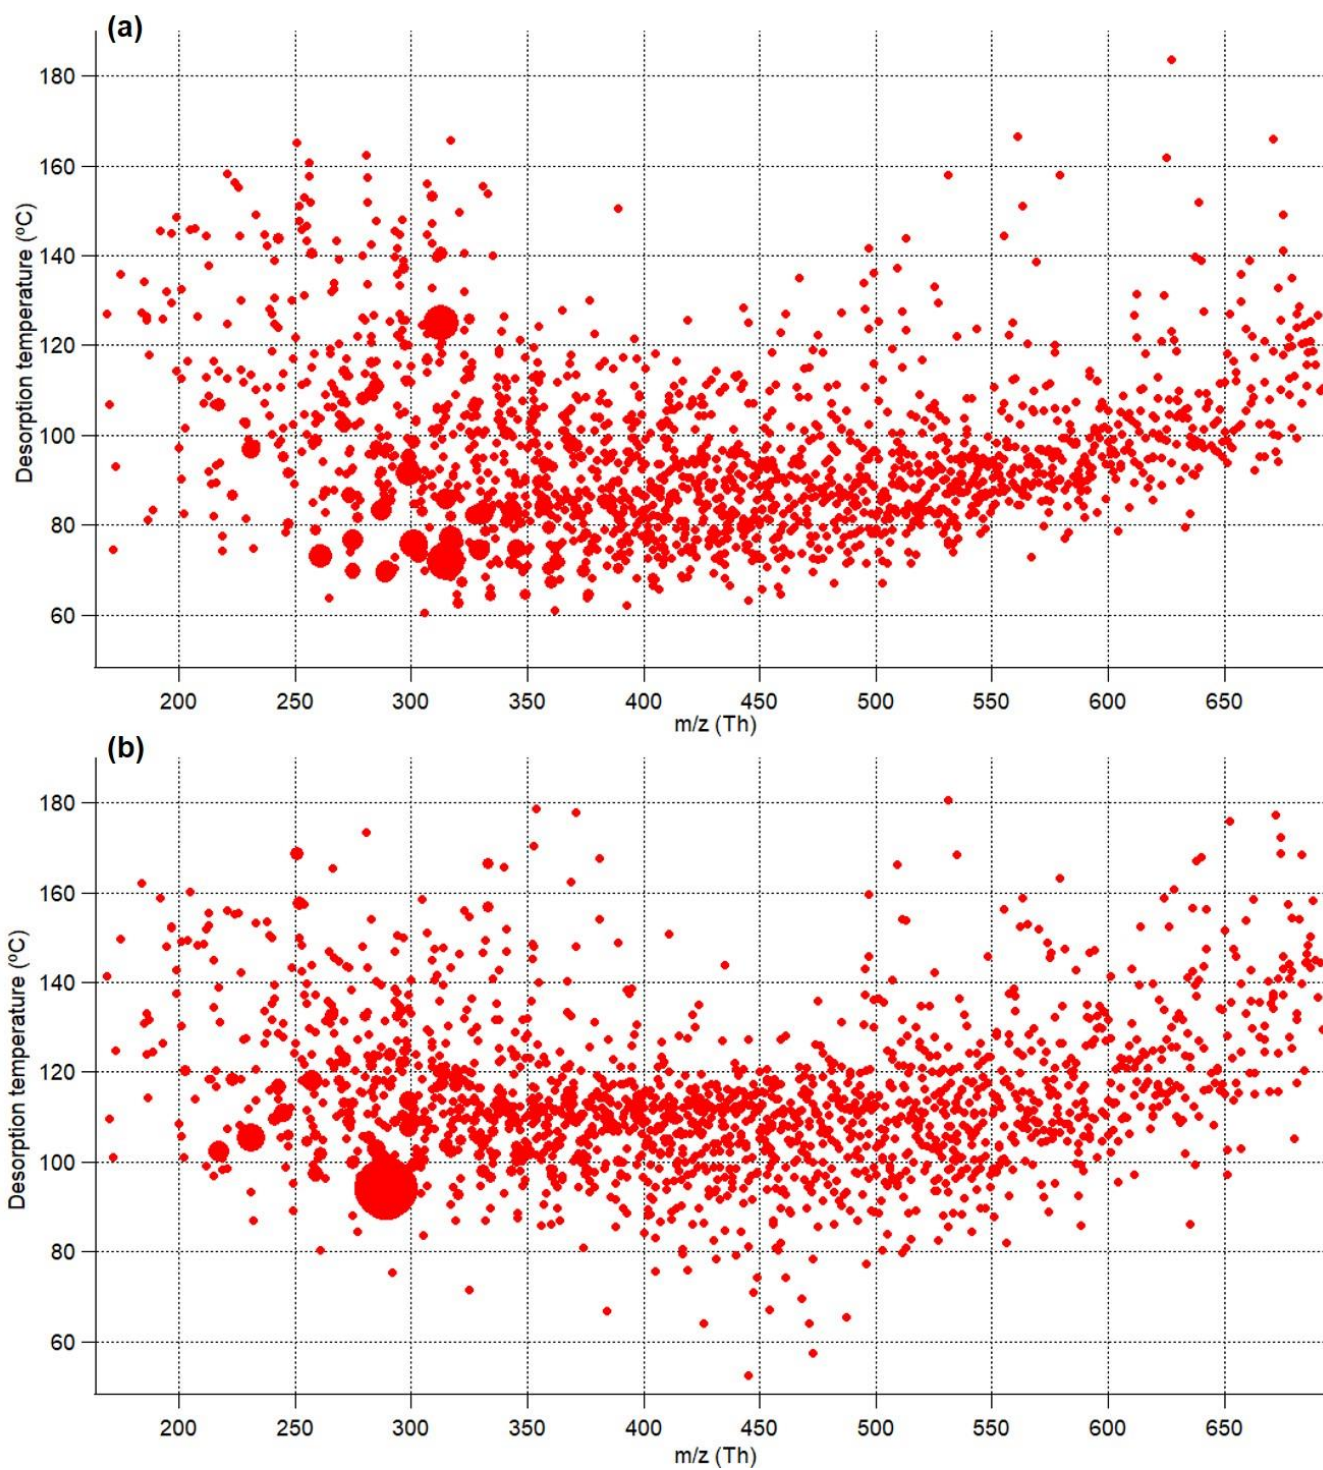

35

**Figure S11.** Mean  $T_{\max}$  distribution of CHOX compounds as a function of  $m/z$  (includes mass of  $\Gamma$  ion;  $m/z$  126.9050 Th) for the summer (a) and winter (b) periods. Markers were sized by their corresponding mass contributions to total CHOX compounds. Mean  $T_{\max}$  were calculated as the campaign-average of the  $T_{\max}$  for each CHOX compound.



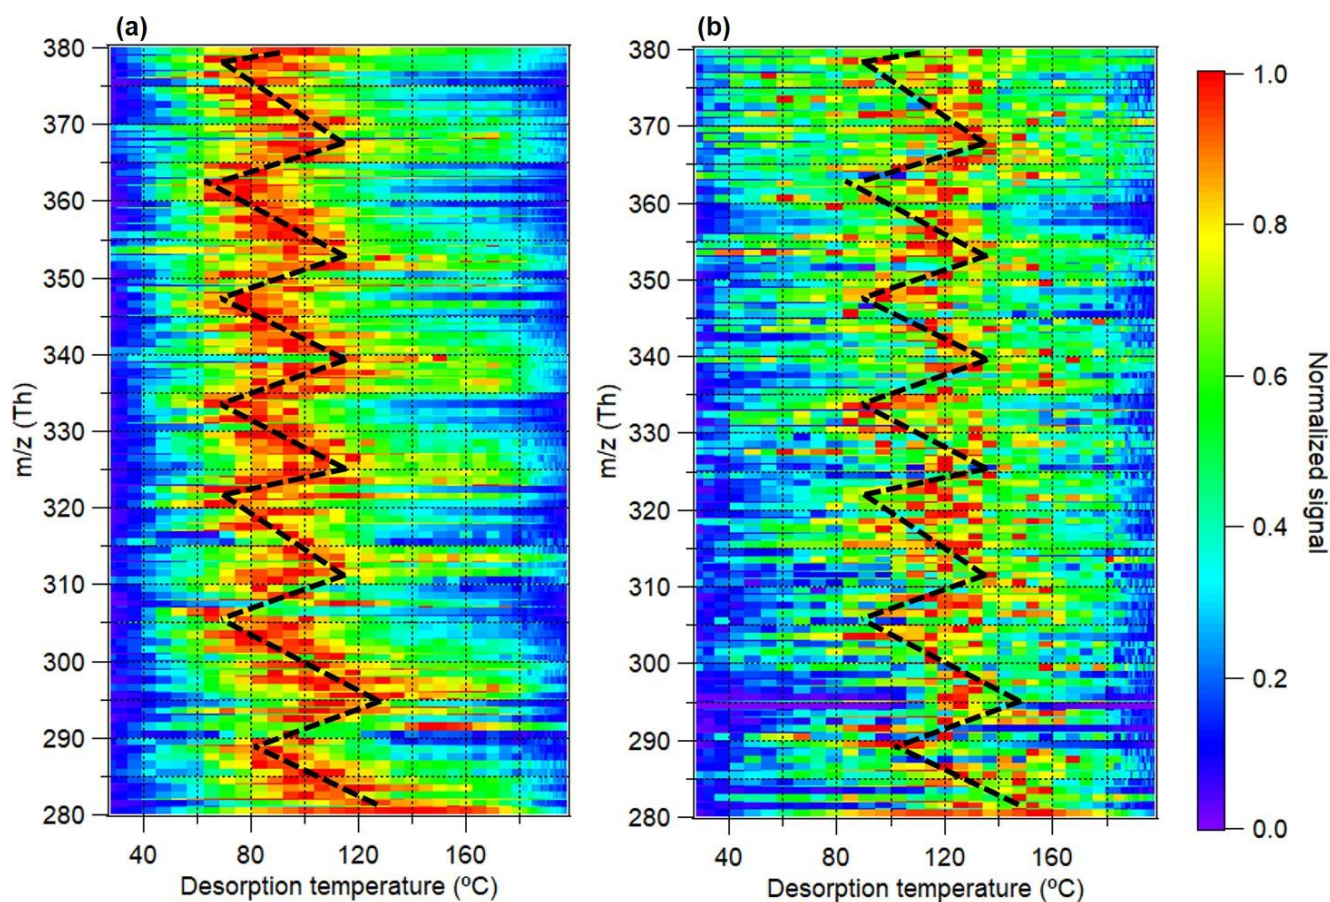

40 **Figure S12.** Comparison of high resolution 2D thermograms of CHOX compounds for mass range 280–380 Th of Figure 4 for the summer (a) and winter (b) periods. The 2D thermograms were normalized to their maximum values. A black dotted line was plotted by hand to guide the eye.

## References

- 45 Farmer, D. K., Matsunaga, A., Docherty, K. S., Surratt, J. D., Seinfeld, J. H., Ziemann, P. J., and Jimenez, J. L.: Response of an aerosol mass spectrometer to organonitrates and organosulfates and implications for atmospheric chemistry, *P Natl Acad Sci USA*, 107, 6670–6675, <https://doi.org/10.1073/pnas.0912340107>, 2010.
- Huang, W., Saathoff, H., Shen, X., Ramisetty, R., Leisner, T., and Mohr, C.: Chemical characterization of highly functionalized organonitrates contributing to night-time organic aerosol mass loadings and particle growth, *Environ Sci Technol*, 53, 1165–1174, <https://doi.org/10.1021/acs.est.8b05826>, 2019.
- 50 Kiendler-Scharr, A., Mensah, A. A., Friese, E., Topping, D., Nemitz, E., Prevot, A. S. H., Äijälä, M., Allan, J., Canonaco, F., Canagaratna, M., Carbone, S., Crippa, M., Dall'Osto, M., Day, D. A., De Carlo, P., Di Marco, C. F., Elbern, H., Eriksson, A., Freney, E., Hao, L., Herrmann, H., Hildebrandt, L., Hillamo, R., Jimenez, J. L., Laaksonen, A., McFiggans, G., Mohr, C., O'Dowd, C., Otjes, R., Ovadnevaite, J., Pandis, S. N., Poulain, L., Schlag, P., Sellegri, K., Swietlicki, E., Tiitta, P., Vermeulen, A., Wahner, A., Worsnop, D., and Wu, H.-C.: Ubiquity of organic nitrates from nighttime chemistry in the European submicron aerosol, *Geophys Res Lett*, 43, 7735–7744, <https://doi.org/10.1002/2016GL069239>, 2016.
- 55
